# Supplementary material
Source: Springer Nature journal article supplement (https://www.springermedizin.de/resource/supplementary/13012_2008_170_MOESM1_ESM.pdf/9629388)
Supplement: MOESM1 [file 9629388]

# Organizational Readiness to Change Assessment

Name of Station: \_\_\_\_\_

## I. Evidence Assessment

**Finding: Practice goals in the VISN ## Cardiac Care Plan will improve outcomes for patients with acute coronary syndromes.**

**Comment [Helfrich1]:** This statement identifies the evidence-based practice being evaluated.

**q1** Based on your assessment of the evidence basis for this statement, please rate the strength of the evidence in your opinion, on a scale of 1 to 5 where 1 is very weak evidence and 5 is very strong evidence:

| very weak | weak | neither weak nor strong | strong | very strong | Don't know / Not applicable |
|-----------|------|-------------------------|--------|-------------|-----------------------------|
| 1         | 2    | 3                       | 4      | 5           | 99                          |

**q2** Now, please rate the strength of the evidence basis for this statement based on how you think respected clinical experts in your institution feel about the strength of the evidence, on a 1 to 5 scale similar to the one above:

| very weak | weak | neither weak nor strong | strong | very strong | Don't know / Not applicable |
|-----------|------|-------------------------|--------|-------------|-----------------------------|
| 1         | 2    | 3                       | 4      | 5           | 99                          |

These items are intended to be differentiated and assessed separately from the other evidence subscales.

For each of the following statements, please rate the strength of your agreement with the statement, from 1 (strongly disagree) to 5 (strongly agree)

**q3** (Research) The proposed practice changes or guideline implementation:

- a) are(is) supported by RCTs or other scientific evidence from the VA
- b) are(is) supported by RCTs or other scientific evidence from other health care systems
- c) should be effective, based on current scientific knowledge
- ~~d) are(is) experimental, but may improve patient outcomes~~
- ~~e) likely won't make much difference in patient outcomes~~

| strongly disagree | disagree     | neither agree nor disagree | agree        | strongly agree | Don't know/ Not Applicable |
|-------------------|--------------|----------------------------|--------------|----------------|----------------------------|
| 1                 | 2            | 3                          | 4            | 5              | 99                         |
| 1                 | 2            | 3                          | 4            | 5              | 99                         |
| 1                 | 2            | 3                          | 4            | 5              | 99                         |
| <del>1</del>      | <del>2</del> | <del>3</del>               | <del>4</del> | <del>5</del>   | <del>99</del>              |
| <del>1</del>      | <del>2</del> | <del>3</del>               | <del>4</del> | <del>5</del>   | <del>99</del>              |

These items were eliminated following subscale reliability analyses.

- q4** (Clinical Experience) The proposed practice changes or guideline implementation:
- a) are supported by clinical experience with VA patients
  - b) are supported by clinical experience with patients in other health care systems
  - c) conform to the opinions of clinical experts in this setting
  - d) ~~have not been attempted in this clinical setting~~

| strongly disagree | disagree     | neither agree nor disagree | agree        | strongly agree | Don't know/ Not Applicable |
|-------------------|--------------|----------------------------|--------------|----------------|----------------------------|
| 1                 | 2            | 3                          | 4            | 5              | 99                         |
| 1                 | 2            | 3                          | 4            | 5              | 99                         |
| 1                 | 2            | 3                          | 4            | 5              | 99                         |
| <del>1</del>      | <del>2</del> | <del>3</del>               | <del>4</del> | <del>5</del>   | <del>99</del>              |

This item was eliminated following subscale reliability analyses.

- q5** (Patient Preferences) The proposed practice changes or guideline implementation:
- a) have been well-accepted by VA patients in a pilot study
  - b) are consistent with clinical practices that have been accepted by VA patients
  - c) take into consideration the needs and preferences of VA patients
  - d) appear to have more advantages than disadvantages for VA patients

| strongly disagree | disagree | neither agree nor disagree | agree | strongly agree | Don't know/ Not Applicable |
|-------------------|----------|----------------------------|-------|----------------|----------------------------|
| 1                 | 2        | 3                          | 4     | 5              | 99                         |
| 1                 | 2        | 3                          | 4     | 5              | 99                         |
| 1                 | 2        | 3                          | 4     | 5              | 99                         |
| 1                 | 2        | 3                          | 4     | 5              | 99                         |

The patient preferences subscale had mediocre reliability but good factor structure; it may need additional items to improve reliability, or may need to be considered separately from the other evidence subscales.

## II. Context Assessment

For each of the following statements, please rate the strength of your agreement with the statement, from 1 (strongly disagree) to 5 (strongly agree).

- q6** (Culture) Senior leadership/clinical management in your organization:
- a) reward clinical innovation and creativity to improve patient care
  - b) solicit opinions of clinical staff regarding decisions about patient care
  - c) seek ways to improve patient education and increase patient participation in treatment

| strongly disagree | disagree | neither agree nor disagree | agree | strongly agree | Don't know/ Not Applicable |
|-------------------|----------|----------------------------|-------|----------------|----------------------------|
| 1                 | 2        | 3                          | 4     | 5              | 99                         |
| 1                 | 2        | 3                          | 4     | 5              | 99                         |
| 1                 | 2        | 3                          | 4     | 5              | 99                         |

**q7** (Culture) Staff members in your organization:

- a) have a sense of personal responsibility for improving patient care and outcomes
- b) cooperate to maintain and improve effectiveness of patient care
- c) are willing to innovate and/or experiment to improve clinical procedures
- d) are receptive to change in clinical processes

| strongly disagree | disagree | neither agree nor disagree | agree | strongly agree | Don't know/ Not Applicable |
|-------------------|----------|----------------------------|-------|----------------|----------------------------|
| 1                 | 2        | 3                          | 4     | 5              | 99                         |
| 1                 | 2        | 3                          | 4     | 5              | 99                         |
| 1                 | 2        | 3                          | 4     | 5              | 99                         |
| 1                 | 2        | 3                          | 4     | 5              | 99                         |

**q8** (Leadership) Senior leadership/Clinical management in your organization:

- a) provide effective management for continuous improvement of patient care
- b) clearly define areas of responsibility and authority for clinical managers and staff
- c) promote team building to solve clinical care problems
- d) promote communication among clinical services and units

| strongly disagree | disagree | neither agree nor disagree | agree | strongly agree | Don't know/ Not Applicable |
|-------------------|----------|----------------------------|-------|----------------|----------------------------|
| 1                 | 2        | 3                          | 4     | 5              | 99                         |
| 1                 | 2        | 3                          | 4     | 5              | 99                         |
| 1                 | 2        | 3                          | 4     | 5              | 99                         |
| 1                 | 2        | 3                          | 4     | 5              | 99                         |

**q9** (Measurement) Senior Leadership/clinical management in your organization:

- a) provide staff with information on VA performance measures and guidelines
- b) establish clear goals for patient care processes and outcomes
- c) provide staff members with feedback/data on effects of clinical decisions
- d) hold staff members accountable for achieving results

| strongly disagree | disagree | Neither agree nor disagree | agree | strongly agree | Don't know/ Not Applicable |
|-------------------|----------|----------------------------|-------|----------------|----------------------------|
| 1                 | 2        | 3                          | 4     | 5              | 99                         |
| 1                 | 2        | 3                          | 4     | 5              | 99                         |
| 1                 | 2        | 3                          | 4     | 5              | 99                         |
| 1                 | 2        | 3                          | 4     | 5              | 99                         |

**q10** (Readiness for change) Opinion leaders in your organization:

- a) believe that the current practice patterns can be improved
- b) encourage and support changes in practice patterns to improve patient care
- c) are willing to try new clinical protocols
- d) work cooperatively with senior leadership/clinical management to make appropriate changes

| strongly disagree | disagree | neither agree nor disagree | agree | strongly agree | Don't know/ Not Applicable |
|-------------------|----------|----------------------------|-------|----------------|----------------------------|
| 1                 | 2        | 3                          | 4     | 5              | 99                         |
| 1                 | 2        | 3                          | 4     | 5              | 99                         |
| 1                 | 2        | 3                          | 4     | 5              | 99                         |
| 1                 | 2        | 3                          | 4     | 5              | 99                         |

The opinion leaders subscale had good reliability but did not load on any factor at the factor loading threshold of 0.60 we set for this analysis. However, we think that's due to the high bar we set. Uniqueness (the amount of variation in the subscale unexplained by the factors) was low, and the factor loading of 0.49, would meet most conventional thresholds.

**q11** (Resources) In general in my organization, when there is agreement that change needs to happen:

- a) we have the necessary support in terms of budget or financial resources
- b) we have the necessary support in terms of training
- c) we have the necessary support in terms of facilities
- d) we have the necessary support in terms of staffing

| strongly disagree | disagree | neither agree nor disagree | agree | strongly agree | Don't know/ Not Applicable |
|-------------------|----------|----------------------------|-------|----------------|----------------------------|
| 1                 | 2        | 3                          | 4     | 5              | 99                         |
| 1                 | 2        | 3                          | 4     | 5              | 99                         |
| 1                 | 2        | 3                          | 4     | 5              | 99                         |
| 1                 | 2        | 3                          | 4     | 5              | 99                         |

In factor analyses, the general resources subscale did not load on factors with the other context subscales, or on any other factor. This may represent a distinct core element, that should be assessed independent of context.

### III. Facilitation Assessment:

For each of the following statements, please rate the strength of your agreement with the statement, from 1 (strongly disagree) to 5 (strongly agree):

**q12** (Characteristics) Senior leadership/clinical management will:

- a) propose a project that is appropriate and feasible
- b) provide clear goals for improvement in patient care
- c) establish a project schedule and deliverables
- d) designate a clinical champion(s) for the project

| strongly disagree | disagree | neither agree nor disagree | agree | strongly agree | Don't know/ Not Applicable |
|-------------------|----------|----------------------------|-------|----------------|----------------------------|
| 1                 | 2        | 3                          | 4     | 5              | 99                         |
| 1                 | 2        | 3                          | 4     | 5              | 99                         |
| 1                 | 2        | 3                          | 4     | 5              | 99                         |
| 1                 | 2        | 3                          | 4     | 5              | 99                         |

The wording for the senior leadership characteristics subscale needs to be revised to address a specific project rather than a generic one to be consonant with the other facilitation subscales.

**q13** (Characteristics) The Project Clinical Champion:

- a) accepts responsibility for the success of this project
- b) has the authority to carry out the implementation
- c) is considered a clinical opinion leader
- d) works well with the intervention team and providers

| strongly disagree | disagree | neither agree nor disagree | agree | strongly agree | Don't know/ Not Applicable |
|-------------------|----------|----------------------------|-------|----------------|----------------------------|
| 1                 | 2        | 3                          | 4     | 5              | 99                         |
| 1                 | 2        | 3                          | 4     | 5              | 99                         |
| 1                 | 2        | 3                          | 4     | 5              | 99                         |
| 1                 | 2        | 3                          | 4     | 5              | 99                         |

**q14** (Role) Senior Leadership/Clinical management/staff opinion leaders:

- a) agree on the goals for this intervention
- b) will be informed and involved in the intervention
- c) agree on adequate resources to accomplish the intervention
- d) set a high priority on the success of the intervention

| strongly disagree | disagree | neither agree nor disagree | agree | strongly agree | Don't know/ Not Applicable |
|-------------------|----------|----------------------------|-------|----------------|----------------------------|
| 1                 | 2        | 3                          | 4     | 5              | 99                         |
| 1                 | 2        | 3                          | 4     | 5              | 99                         |
| 1                 | 2        | 3                          | 4     | 5              | 99                         |
| 1                 | 2        | 3                          | 4     | 5              | 99                         |

**q15** (Role) The implementation team members:

- a) share responsibility for the success of this project
- b) have clearly defined roles and responsibilities
- c) have release time or can accomplish intervention tasks within their regular work load
- d) have staff support and other resources required for the project

| strongly disagree | disagree | neither agree nor disagree | agree | strongly agree | Don't know/ Not Applicable |
|-------------------|----------|----------------------------|-------|----------------|----------------------------|
| 1                 | 2        | 3                          | 4     | 5              | 99                         |
| 1                 | 2        | 3                          | 4     | 5              | 99                         |
| 1                 | 2        | 3                          | 4     | 5              | 99                         |
| 1                 | 2        | 3                          | 4     | 5              | 99                         |

**q16** (Style) The implementation plan for this intervention:

- a) identifies specific roles and responsibilities
- b) clearly describes tasks and timelines
- c) includes appropriate provider/patient education
- d) acknowledges staff input and opinions

| strongly disagree | disagree | neither agree nor disagree | agree | strongly agree | Don't know/ Not Applicable |
|-------------------|----------|----------------------------|-------|----------------|----------------------------|
| 1                 | 2        | 3                          | 4     | 5              | 99                         |
| 1                 | 2        | 3                          | 4     | 5              | 99                         |
| 1                 | 2        | 3                          | 4     | 5              | 99                         |
| 1                 | 2        | 3                          | 4     | 5              | 99                         |

**q17** (Style) Communication will be maintained through:

- a) regular project meetings with the project champion and team members
- b) involvement of quality management staff in project planning and implementation
- c) regular feedback to clinical management on progress of project activities and resource needs
- d) regular feedback to clinicians on effects of practice changes on patient care/outcomes

| strongly disagree | disagree | neither agree nor disagree | agree | strongly agree | Don't know/ Not Applicable |
|-------------------|----------|----------------------------|-------|----------------|----------------------------|
| 1                 | 2        | 3                          | 4     | 5              | 99                         |
| 1                 | 2        | 3                          | 4     | 5              | 99                         |
| 1                 | 2        | 3                          | 4     | 5              | 99                         |
| 1                 | 2        | 3                          | 4     | 5              | 99                         |

**q18** (Style) Progress of the project will be measured by:

- a) collecting feedback from patients regarding proposed/implemented changes
- b) collecting feedback from staff regarding proposed/implemented changes
- c) developing and distributing regular performance measures to clinical staff
- d) providing a forum for presentation/discussion of results and implications for continued improvements

| strongly disagree | disagree | neither agree nor disagree | agree | strongly agree | Don't know/ Not Applicable |
|-------------------|----------|----------------------------|-------|----------------|----------------------------|
| 1                 | 2        | 3                          | 4     | 5              | 99                         |
| 1                 | 2        | 3                          | 4     | 5              | 99                         |
| 1                 | 2        | 3                          | 4     | 5              | 99                         |
| 1                 | 2        | 3                          | 4     | 5              | 99                         |

**q19** (Resources) The following are available to make the selected plan work:

- a) staff incentives
- b) equipment and materials
- c) patient awareness/need
- d) provider buy-in
- e) intervention team
- f) evaluation protocol

| strongly disagree | disagree | neither agree nor disagree | agree | strongly agree | Don't know/ Not Applicable |
|-------------------|----------|----------------------------|-------|----------------|----------------------------|
| 1                 | 2        | 3                          | 4     | 5              | 99                         |
| 1                 | 2        | 3                          | 4     | 5              | 99                         |
| 1                 | 2        | 3                          | 4     | 5              | 99                         |
| 1                 | 2        | 3                          | 4     | 5              | 99                         |
| 1                 | 2        | 3                          | 4     | 5              | 99                         |
| 1                 | 2        | 3                          | 4     | 5              | 99                         |

**q20** (Evaluation) Plans for evaluation and improvement of this intervention include:

- a) periodic outcome measurement
- b) staff participation/satisfaction survey
- c) patient satisfaction survey
- d) dissemination plan for performance measures
- e) review of results by clinical leadership

| strongly disagree | disagree | neither agree nor disagree | agree | strongly agree | Don't know/ Not Applicable |
|-------------------|----------|----------------------------|-------|----------------|----------------------------|
| 1                 | 2        | 3                          | 4     | 5              | 99                         |
| 1                 | 2        | 3                          | 4     | 5              | 99                         |
| 1                 | 2        | 3                          | 4     | 5              | 99                         |
| 1                 | 2        | 3                          | 4     | 5              | 99                         |
| 1                 | 2        | 3                          | 4     | 5              | 99                         |
